# Supplementary material for: Optimization of a pretreatment and hydrolysis process for the efficient recovery of recycled sugars and unknown compounds from agricultural sweet sorghum bagasse stem pith solid waste
Source: PeerJ journal article supplement (doi:10.7717/peerj.6186), 2019-01-10
Supplement: Fig._4_Supplementary_Information.pdf [file Fig._4_Supplementary_Information.pdf]

## Supplementary Information

# Optimization of a pretreatment and hydrolysis process for the efficient recovery of recycled sugars and unknown compounds from agricultural sweet sorghum bagasse stem pith solid waste

Ting-Ting Jiang<sup>1,2, †</sup>, Yan Liang<sup>3, †</sup>, Xiang Zhou<sup>1,\*</sup>, Zi-Wei Shi<sup>4</sup>, Zhi-Jun Xin<sup>1</sup>

1. Institute of Modern Physics, Chinese Academy of Sciences, 509 Nanchang Rd., Lanzhou, Gansu 730000, People's Republic of China

2. University of Chinese Academy of Sciences, No. 19(A) Yuquan Road, Shijingshan District, Beijing 100049, People's Republic of China

3. School of Pharmacy, Lanzhou University, 199 West Donggang Road, Lanzhou, Gansu 730020, People's Republic of China

4. Gansu Agricultural University, No. 1 Yingmen Village, Anning District, Lanzhou, 730070, Gansu Province, People's Republic of China

**\* Corresponding author**

**Dr Xiang Zhou** ([syannovich@gmail.com](mailto:syannovich@gmail.com), [syannovich@impcas.ac.cn](mailto:syannovich@impcas.ac.cn))

**† These authors contributed equally to this work.**

**Fig. 4 (A) Raw data of chromatogram of standard monosaccharide solution.**

| [min]  | [Type] | [mAU*s]    | [(ng/ul)/( mAU*s)] | [ng/ul]  | [Name]            |
|--------|--------|------------|--------------------|----------|-------------------|
| 13.301 | BB     | 1235.42664 | 1.96640e-2         | 24.29344 | Mannose           |
| 17.095 | BV     | 1488.10315 | 1.61405e-2         | 24.01880 | Ribose            |
| 17.761 | VB     | 899.90149  | 2.22013e-2         | 19.97902 | Rhamnose          |
| 21.173 | BB     | 1029.82788 | 2.04777e-2         | 21.08850 | Gluconic acid     |
| 24.441 | BB     | 954.92267  | 1.96537e-2         | 18.76774 | Galacturonic acid |
| 27.725 | BB     | 1069.20532 | 1.88861e-2         | 20.19309 | Glucose           |
| 31.767 | BV     | 769.52203  | 3.34024e-2         | 25.70390 | Galactose         |
| 33.119 | VV     | 1328.41016 | 1.63758e-2         | 21.75379 | Xylose            |
| 34.619 | VB     | 1262.28113 | 1.62462e-2         | 20.50733 | Arabinose         |
| 39.206 | VB     | 918.33685  | 2.17410e-2         | 19.96560 | Fucose            |

**Fig. 4 (B) Raw data of chromatogram of ten monosaccharides in hydrolysis solution.**

| [min]  | [Type] | [mAU*s]    | [(ng/ul)/( mAU*s)] | [ng/ul]    | [Name]            |
|--------|--------|------------|--------------------|------------|-------------------|
| 13.377 | BB     | 971.99304  | 1.96858e-2         | 19.13447   | Mannose           |
| 16.998 | BV     | 19.23689   | 2.17252e-2         | 4.17925e-1 | Ribose            |
| 17.880 | VB     | 146.24203  | 2.22559e-2         | 3.25475    | Rhamnose          |
| 21.356 | BB     | 463.76013  | 2.05921e-2         | 9.54978    | Gluconic acid     |
| 24.627 | BB     | 1012.54559 | 1.96493e-2         | 19.89577   | Galacturonic acid |
| 27.548 | BB     | 4.07507e4  | 1.86370e-2         | 759.46821  | Glucose           |
| 31.948 | BV     | 1246.34314 | 3.31729e-2         | 41.34476   | Galactose         |
| 33.145 | VV     | 1.95277e4  | 1.66477e-2         | 325.09258  | Xylose            |
| 34.762 | VB     | 7620.26123 | 1.60670e-2         | 122.43485  | Arabinose         |
| 39.336 | VB     | 67.41366   | 1.59135e-2         | 1.07279    | Fucose            |
