# Supplementary material for: Optimization of a pretreatment and hydrolysis process for the efficient recovery of recycled sugars and unknown compounds from agricultural sweet sorghum bagasse stem pith solid waste
Source: PeerJ. 2019 Jan 10;6:e6186. doi: 10.7717/peerj.6186 (PMC6330209; doi:10.7717/peerj.6186)
Supplement: Supplemental Information 1 [file peerj-07-6186-s001.xlsx]

## Sheet: Sheet1
Fig. 2. Box plot of an included set of raw data at 25 ℃, 50 ℃, 75 ℃ and 100 ℃.
25 ℃ Data	[53,53]	[46,46]	[51,53]	[46,49]	[63,63]	[51,51]	[58,63]	[51,53]	[62,62]	[55,55]	[59,62]	[55,56]	[66,66]	[54,54]	[61,66]	[54,57]	[68,68]	[60,60]	[65,68]	[60,62]	[72,72]	[56,56]	[66,72]	[56,62]	[49,49,51,51,49]	[53,53,58,58,53]	[56,56,59,59,56]	[57,57,61,61,57]	[62,62,65,65,62]	[62,62,66,66,62]	[65,63,59,58,55,50]	1x11 double	[5.75000000000000,6.25000000000000]	[5.75000000000000,6.25000000000000]	[6,6]	[6,6]	[4.75000000000000,5.25000000000000]	[4.75000000000000,5.25000000000000]	[5,5]	[5,5]	[3.75000000000000,4.25000000000000]	[3.75000000000000,4.25000000000000]	[4,4]	[4,4]	[2.75000000000000,3.25000000000000]	[2.75000000000000,3.25000000000000]	[3,3]	[3,3]	[1.75000000000000,2.25000000000000]
50 ℃ Data	[47,47]	[40,40]	[45,47]	[40,43]	[56,56]	[44,44]	[51,56]	[44,46]	[52,52]	[45,45]	[49,52]	[45,46]	[60,60]	[48,48]	[55,60]	[48,51]	[63,63]	[53,53]	[59,63]	[53,55]	[65,65]	[57,57]	[62,65]	[57,60]	[43,43,45,45,43]	[46,46,51,51,46]	[46,46,49,49,46]	[51,51,55,55,51]	[55,55,59,59,55]	[60,60,62,62,60]	[62,57,53,48,48,43]	6	[5.75000000000000,6.25000000000000]	[5.75000000000000,6.25000000000000]	[6,6]	[6,6]	[4.75000000000000,5.25000000000000]	[4.75000000000000,5.25000000000000]	[5,5]	[5,5]	[3.75000000000000,4.25000000000000]	[3.75000000000000,4.25000000000000]	[4,4]	[4,4]	[2.75000000000000,3.25000000000000]	[2.75000000000000,3.25000000000000]	[3,3]	[3,3]	[1.75000000000000,2.25000000000000]
75 ℃ Data	[39]	[36,36]	[29,29]	[34,36]	[29,32]	[44,44]	[32,32]	[39,44]	[32,34]	[41,41]	[34,34]	[38,41]	[34,35]	[44,44]	[32,32]	[39,44]	[32,35]	[44,44]	[34,34]	[40,44]	[34,36]	[48,48]	[41,41]	[45,48]	[41,43]	[32,32,34,34,32]	[34,34,39,39,34]	[35,35,38,38,35]	[35,35,39,39,35]	[36,36,40,40,36]	[43,43,45,45,43]	[45,38,37,37,36,32]	6	[5.75000000000000,6.25000000000000]	[5.75000000000000,6.25000000000000]	[6,6]	[6,6]	[4.75000000000000,5.25000000000000]	[4.75000000000000,5.25000000000000]	[5,5]	[5,5]	[3.75000000000000,4.25000000000000]	[3.75000000000000,4.25000000000000]	[4,4]	[4,4]	[2.75000000000000,3.25000000000000]	[2.75000000000000,3.25000000000000]	[3,3]	[3,3]
100 ℃ Data	[65,61,65,66,65,62,34,36,35,36]	[32,32]	[23,23]	[29,32]	[23,26]	[33,33]	[25,25]	[31,33]	[25,27]	[37,37]	[30,30]	[36,37]	[30,32]	[44,44]	[32,32]	[39,44]	[32,35]	[47,47]	[37,37]	[43,47]	[37,39]	[48,48]	[40,40]	[46,48]	[40,43]	[26,26,29,29,26]	[27,27,31,31,27]	[32,32,36,36,32]	[35,35,39,39,35]	[39,39,43,43,39]	[43,43,46,46,43]	[45,41,37,33,30,28]	[1,1,1,1,1,1,6,6,6,6]	[5.75000000000000,6.25000000000000]	[5.75000000000000,6.25000000000000]	[6,6]	[6,6]	[4.75000000000000,5.25000000000000]	[4.75000000000000,5.25000000000000]	[5,5]	[5,5]	[3.75000000000000,4.25000000000000]	[3.75000000000000,4.25000000000000]	[4,4]	[4,4]	[2.75000000000000,3.25000000000000]	[2.75000000000000,3.25000000000000]	[3,3]	[3,3]
	25 ℃ xData		25 ℃ yData										50 ℃ xData		50 ℃ yData									75 ℃ xData		75 ℃ yData										100 ℃ xData			100 ℃ yData
	[53,53]		[5.75000000000000,6.25000000000000]										[50]		[6]									[39]		[6]										[65,61,65,66,65,62,34,36,35,36]			[1,1,1,1,1,1,6,6,6,6]
	[46,46]		[5.75000000000000,6.25000000000000]										[47,47]		[5.75000000000000,6.25000000000000]									[36,36]		[5.75000000000000,6.25000000000000]										[32,32]			[5.75000000000000,6.25000000000000]
	[51,53]		[6,6]										[40,40]		[5.75000000000000,6.25000000000000]									[29,29]		[5.75000000000000,6.25000000000000]										[23,23]			[5.75000000000000,6.25000000000000]
	[46,49]		[6,6]										[45,47]		[6,6]									[34,36]		[6,6]										[29,32]			[6,6]
	[63,63]		[4.75000000000000,5.25000000000000]										[40,43]		[6,6]									[29,32]		[6,6]										[23,26]			[6,6]
	[51,51]		[4.75000000000000,5.25000000000000]										[56,56]		[4.75000000000000,5.25000000000000]									[44,44]		[4.75000000000000,5.25000000000000]										[33,33]			[4.75000000000000,5.25000000000000]
	[58,63]		[5,5]										[44,44]		[4.75000000000000,5.25000000000000]									[32,32]		[4.75000000000000,5.25000000000000]										[25,25]			[4.75000000000000,5.25000000000000]
	[51,53]		[5,5]										[51,56]		[5,5]									[39,44]		[5,5]										[31,33]			[5,5]
	[62,62]		[3.75000000000000,4.25000000000000]										[44,46]		[5,5]									[32,34]		[5,5]										[25,27]			[5,5]
	[55,55]		[3.75000000000000,4.25000000000000]										[52,52]		[3.75000000000000,4.25000000000000]									[41,41]		[3.75000000000000,4.25000000000000]										[37,37]			[3.75000000000000,4.25000000000000]
	[59,62]		[4,4]										[45,45]		[3.75000000000000,4.25000000000000]									[34,34]		[3.75000000000000,4.25000000000000]										[30,30]			[3.75000000000000,4.25000000000000]
	[55,56]		[4,4]										[49,52]		[4,4]									[38,41]		[4,4]										[36,37]			[4,4]
	[66,66]		[2.75000000000000,3.25000000000000]										[45,46]		[4,4]									[34,35]		[4,4]										[30,32]			[4,4]
	[54,54]		[2.75000000000000,3.25000000000000]										[60,60]		[2.75000000000000,3.25000000000000]									[44,44]		[2.75000000000000,3.25000000000000]										[44,44]			[2.75000000000000,3.25000000000000]
	[61,66]		[3,3]										[48,48]		[2.75000000000000,3.25000000000000]									[32,32]		[2.75000000000000,3.25000000000000]										[32,32]			[2.75000000000000,3.25000000000000]
	[54,57]		[3,3]										[55,60]		[3,3]									[39,44]		[3,3]										[39,44]			[3,3]
	[68,68]		[1.75000000000000,2.25000000000000]										[48,51]		[3,3]									[32,35]		[3,3]										[32,35]			[3,3]
	[60,60]		[1.75000000000000,2.25000000000000]										[63,63]		[1.75000000000000,2.25000000000000]									[44,44]		[1.75000000000000,2.25000000000000]										[47,47]			[1.75000000000000,2.25000000000000]
	[65,68]		[2,2]										[53,53]		[1.75000000000000,2.25000000000000]									[34,34]		[1.75000000000000,2.25000000000000]										[37,37]			[1.75000000000000,2.25000000000000]
	[60,62]		[2,2]										[59,63]		[2,2]									[40,44]		[2,2]										[43,47]			[2,2]
	[72,72]		[0.750000000000000,1.25000000000000]										[53,55]		[2,2]									[34,36]		[2,2]										[37,39]			[2,2]
	[56,56]		[0.750000000000000,1.25000000000000]										[65,65]		[0.750000000000000,1.25000000000000]									[48,48]		[0.750000000000000,1.25000000000000]										[48,48]			[0.750000000000000,1.25000000000000]
	[66,72]		[1,1]										[57,57]		[0.750000000000000,1.25000000000000]									[41,41]		[0.750000000000000,1.25000000000000]										[40,40]			[0.750000000000000,1.25000000000000]
	[56,62]		[1,1]										[62,65]		[1,1]									[45,48]		[1,1]										[46,48]			[1,1]
	[49,49,51,51,49]		[5.75000000000000,6.25000000000000,6.25000000000000,5.75000000000000,5.75000000000000]										[57,60]		[1,1]									[41,43]		[1,1]										[40,43]			[1,1]
	[53,53,58,58,53]		[4.75000000000000,5.25000000000000,5.25000000000000,4.75000000000000,4.75000000000000]										[43,43,45,45,43]		[5.75000000000000,6.25000000000000,6.25000000000000,5.75000000000000,5.75000000000000]									[32,32,34,34,32]		[5.75000000000000,6.25000000000000,6.25000000000000,5.75000000000000,5.75000000000000]										[26,26,29,29,26]			[5.75000000000000,6.25000000000000,6.25000000000000,5.75000000000000,5.75000000000000]
	[56,56,59,59,56]		[3.75000000000000,4.25000000000000,4.25000000000000,3.75000000000000,3.75000000000000]										[46,46,51,51,46]		[4.75000000000000,5.25000000000000,5.25000000000000,4.75000000000000,4.75000000000000]									[34,34,39,39,34]		[4.75000000000000,5.25000000000000,5.25000000000000,4.75000000000000,4.75000000000000]										[27,27,31,31,27]			[4.75000000000000,5.25000000000000,5.25000000000000,4.75000000000000,4.75000000000000]
	[57,57,61,61,57]		[2.75000000000000,3.25000000000000,3.25000000000000,2.75000000000000,2.75000000000000]										[46,46,49,49,46]		[3.75000000000000,4.25000000000000,4.25000000000000,3.75000000000000,3.75000000000000]									[35,35,38,38,35]		[3.75000000000000,4.25000000000000,4.25000000000000,3.75000000000000,3.75000000000000]										[32,32,36,36,32]			[3.75000000000000,4.25000000000000,4.25000000000000,3.75000000000000,3.75000000000000]
	[62,62,65,65,62]		[1.75000000000000,2.25000000000000,2.25000000000000,1.75000000000000,1.75000000000000]										[51,51,55,55,51]		[2.75000000000000,3.25000000000000,3.25000000000000,2.75000000000000,2.75000000000000]									[35,35,39,39,35]		[2.75000000000000,3.25000000000000,3.25000000000000,2.75000000000000,2.75000000000000]										[35,35,39,39,35]			[2.75000000000000,3.25000000000000,3.25000000000000,2.75000000000000,2.75000000000000]
	[62,62,66,66,62]		[0.750000000000000,1.25000000000000,1.25000000000000,0.750000000000000,0.750000000000000]										[55,55,59,59,55]		[1.75000000000000,2.25000000000000,2.25000000000000,1.75000000000000,1.75000000000000]									[36,36,40,40,36]		[1.75000000000000,2.25000000000000,2.25000000000000,1.75000000000000,1.75000000000000]										[39,39,43,43,39]			[1.75000000000000,2.25000000000000,2.25000000000000,1.75000000000000,1.75000000000000]
	[65,63,59,58,55,50]		[1,2,3,4,5,6]										[60,60,62,62,60]		[0.750000000000000,1.25000000000000,1.25000000000000,0.750000000000000,0.750000000000000]									[43,43,45,45,43]		[0.750000000000000,1.25000000000000,1.25000000000000,0.750000000000000,0.750000000000000]										[43,43,46,46,43]			[0.750000000000000,1.25000000000000,1.25000000000000,0.750000000000000,0.750000000000000]
													[62,57,53,48,48,43]		[1,2,3,4,5,6]									[45,38,37,37,36,32]				[1,2,3,4,5,6]								[45,41,37,33,30,28]						[1,2,3,4,5,6]
[truncated: 15 more columns]
